# Supplementary material
Source: Elsevier journal article supplement (https://www.sciencedirect.com/science/article/pii/S1130140615000066)
Supplement: mmc1 [file S1130140615000066:mmc1.docx]

10 20 30 40 50 60 70 80 90 100

ATCC-Cp ---------------------CATAAACAAACAGTACATGCTTATGAGACATATTTAACCAAGGACAAGAGTGATAGTAAATTGTTGATTGAACGATCAA

Cp-1 ....................................................................................................

ATCC-Cm .....................---------..T..T...........A..T.....G..T.....T..............G.................G.

Cm-1 ....................................................................................................

Cm-2 .....................---------..T..T...........A..T.....G..T.....T..............G.................G.

ATCC-Co ....................................................................................................

Co-1 .....................---------------------.G.AGTGATA..GGCTGTGGTCT.TTTTT..G..T.G....A................

Co-2 .....................------AC......T..............T...........A....................A................

Co-3 .....................-------------------------------------------------------------------------------

Co-4 .....................-------------------------------------------------------------------------------

Co-5 AGGTTGGATAACCTACGTCAA..............T..............T...........A....................A................

Co-6 .....................------------------------------.GGC.GTGGTCTCTTTTTT.GTT.GAATGTA...GT....T.......T

Co-7 .....................------AC......T..............T...........A....................A................

Co-8 .....................------AC......T..............T...........A....................A................

HE681722 AACAGTTCATGCTTATGAGACTTATTTA.CCA.AG...A.AG.GAT..TA.AT.A.TGATTGAACG.TC.AAA..GAA...GAAG.T.AAAC.AAG.G..

110 120 130 140 150 160 170 180 190 200

ATCC-CpAATTGAAAAAGAAGATGAAGCAAAGTGAACAAAAAAAACAGCAACAGCATCAGCAACAGCAACAGCAACAACACGAGAGTGCAAATTTGCAACTGCTGCA

Cp-1 ....................................................................................................

ATCC-Cm ..A....G......T....A..G...........G..G..A..G..A..A..A........G..A........------------------G.A..A...

Cm-1 ....................................................................................................

Cm-2 ..A....G......T....A..G...........G..G..A..G..A..A..A........G..A........------------------G.A..A...

ATCC-Co ....................................................................................................

Co-1 ..A...........T.A..A..............G.....A..TG..GCAAGTTTG.......T.....TG..------------------.....AA.-

Co-2 ..A...........T.A..A..............G.....A..TG..GCAAGTTTG.......T.....TG..------------------.....AA.-

Co-3 ----------------------------------------------------------------------------------------------------

Co-4 --A...........T.A..A..T...........G.....A..TG..GCAAGTTTG.......T.....TG..------------------.....AA..

Co-5 ..A...........T.A..A..............G.....A..TG..GCAAGTTTG.......T.....TG..------------------.....AA.-

Co-6 .TA...........T.A..A..T...........G.....A..TG..GCAAG.TTG.......T.....TG..------------------.....AT..

Co-7 ..A...........T.A..A..............G.....A..TG..GCAAGTTTG.......T.....TG..------------------.....AA.-

Co-8 .GA...........T.A..A..............G.....A..TG.AGCAAGTTTG.......T...G.CG..------------------.....AA.T

HE681722 C.AAAG...CA.CATGAGGCA.GTT..C.GC..CTGC.ACTGC.ACTGCAACAACGACAACCACAAT...C.TATG..CAAA.TTCACCACTTCCAACTT

210 220 230 240 250 260 270 280 290 300

ATCC-CpACAACGACAACAGCAACCACAACAACTACAATTGCAATCACAATATACTTATGGACAACCATCACCTGTACCACCATCACAAAATCCAACATCTTCTTTC

Cp-1 ....................................................................................................

ATCC-Cm .....A......A...G..AG....------------...GGT.....G.........TT.C..G..---------........CT.T.TTC....A..T

Cm-1 ....................................................................................................

Cm-2 .....A......A...G..AG....------------...GGT.....G.........TT.C..G..---------........CT.T.TTC....A..T

ATCC-Co ....................................................................................................

Co-1 --------------------...G.---------...C.......C..C.........AAT.....AC.T...A.T.........T...TTC....A...

Co-2 --------------------...G.---------...C.......C..C.........AAT.....AC.T...A.T.........T...TTC....A...

Co-3 -------------------------------------------------.........AAT.....AC.T...A.T.......G.T...TTC....A...

Co-4 ..------------------G....------------C.......C..C.........AAT.....AC.T...A.T.........T...TTC....A...

Co-5 --------------------...G.---------...C.......C..C.........AAT.....AC.T...A.T.........T...TTC....A...

Co-6 ..------------------G....------------C.......C..C.........AAT.....AC.T...A.T.........T...TTC....A...

Co-7 --------------------...G.---------...C.......C..C.........AAT.....AC.T...A.T.........T...TTC....A...

Co-8 G....TG.....A.G..A.....G.---------...CA......C..C.........AAT.....AC.T...A.T.......G.T...TTC....A...

HE681722 CAC.AA.TTCA.TTCCTTCATT...TC.ATC.CATT..GGT...CA.A.GTATATGTCTGG.A..TATCCTATT..AGGAC.GCAA.....A.AA.AACA

310 320 330 340 350 360 370 380 390 400

ATCC-CpACTCCATCTCACTATGGGAATCAAGTATACA-TGCCAGGAAACTATCCTACACAAGG---------------------------ACAACATCAACAGCAG

Cp-1 ....................................................................................................

ATCC-Cm ....A......A...AAC..C...A.G..T.A.AA..CC.TT.A.GGAC.T-...CA................................GG.........

Cm-1 ....................................................................................................

Cm-2 ....A......A...AAC..C...A.G..T.A.AA..CC.TT.A.GGAC.T-...CA................................GG.........

ATCC-Co ....................................................................................................

Co-1 .A..A......T.....T......A.G..T....T.T..T..........TT.....ACAGCAACAACAACAACAACAACAACA......A.....A..A

Co-2 .A..A......T.....T......A.G..T....T.T..T..........TT.....ACAGCAACAACAACAACAACAACAACA......A.....A..A

Co-3 .A..A.....GT.....T......A.G..T....T.TA.T..........TT....................ACAACAACAACA......A.....A..A

Co-4 .A..A......T.....T......A.G..T....T.T..T..........TT...................................G..A.....A..A

Co-5 .A..A......T.....T......A.G..T....T.T..T..........TT.....ACAGCATCAACAACATCAACAACAACA......A.....A..A

Co-6 .A..A......T.....T......A.G..T....T.T..T..........TT...................................G..A.....A..A

Co-7 .A..A......T.....T......A.G..T....T.T..T..........TT.......................ACAGCAACA......A.....A..A

Co-8 .A..A.....GT.....T......A.G..T....T.TA.T..........TT.....ACAACAACAACAACAACAACAACAACA......A.....A..A

HE681722 ..AA..A.AAC.ATCCTT.CC.C.AGC.CA.ACATTTAC..GTC.GGTGC..ATGCCGGGTGGATATATGAATGGACAGTATCTGGTT.CATT......A

410 420 430 440 450 460 470 480 490 500

ATCC-CpCAACCACT---AC---AGGGACAGCCATTTTCTAGTCACGTGCCTATTCCAAGTGTAT------ATAATGGACAGTATCTGGTACCTCTACAACAATCA-

Cp-1 ....................................................................................................

ATCC-Cm TC....T.GCC......A.CT..AA.......C.AC..A..T....AA.A.G...GT.TTACCA..GG......T........T..AT...........A

Cm-1 ....................................................................................................

Cm-2 TC....T.GCC......A.CT..AA.......C.AC..A..T....AA.A.G...GT.TTACCA..GG......T........T..AT...........A

ATCC-Co ....................................................................................................

Co-1 ......TCCTT..CCC.A.CT..AA.....A.A.....G.....A..G..GG...G..ATA...TG.................T..AT....G......C

Co-2 ......TCCTT..CCC.A.CT..AA.....A.A.....G.....A..G..GG...G..ATA...TG.................T..AT....G......C

Co-3 ......TCCTT..CCC.A.CT..AA.....A.A.....G.....A..G..GG...G..ATA...TG...........C...A.T..AT....G......C

Co-4 ....A..AACA..AAC.ACA...A-..ACAA.A.CAACAACAA.A.CAA...CAAC.-.......C..CA-...AC.A.AACA..AA.A.......CA..

Co-5 ......TCCTT..CCC.A.CT..AA.....A.A.....G.....A..G..GG...G..ATA...TG.................T..AT....G......C

Co-6 ....A..AACA..AAC.ACA...A-..ACAA.A.CAACAACAA.A.CAA...CAAC.-.......C..CA-...AC.A.AACA..GA.A.......CA..

Co-7 ......TCCTT..CCC.A.CT..AA.....A.A.....G.....A..G..GG...G..ATA...TG.................T..AT....G......C

Co-8 ......TCCTT..CCC.A.CT..AA.....A.A.....G..T..A..G..GG...G..ATA...TG...........C...A.T..AT....G......C

HE681722 TC..AT..GCA..TGC.TCT...A.AG.C.CAATT.GCACAA.A.TCG..TGA..GTCAACAACTG.TGTC...A.CAACATAT.ACAA..C.TT.C.CC

510 520 530 540 550 560 570 580 590 600

ATCC-Cp -----CAATCACAGCATAAACC---ATTACCTCCATTGCC-TCATCA-----------AGTGGATCAACAGCAG--------------------------

Cp-1 ....................................................................................................

ATCC-Cm TACTG...CTG..A.TGC...TGCA.....AG.A.C...TG.T.C..CGACACTCACC...TA.......A..ATCGCCTGATAGTCAATCACTGATGAC

Cm-1 ....................................................................................................

Cm-2 TACTG...CTG..A.TGC...TGCA.....AG.A.C...TG.T.C..CGACACTCACC...TA.......A..ATCGCCTGATAGTCAATCACTGATGAC

ATCC-Co ....................................................................................................

Co-1 ATCTG...CTG..T.TAC...AGTCTCA.TT.A..CAA.AT..GC.T...........-.AT.G......A.T.ATGTC.....................

Co-2 ATCTG...CTG..T.TAC...AGTCTCA.TT.A..CAA.AT..GC.T...........-.AT.G......A.T.ATGTC.....................

Co-3 ATCTG...CTG..C.TAC...AGTCTCA.TT.A..CAA.AT..GC.T...........-.AT.G........T.GTGTC.....................

Co-4 ........CAG..A..ATG---...---------------.------...........----------------..........................

Co-5 ATCTG...CTG..T.TAC...AGTCTCA.TT.A..CAA.AT..GC.T...........-.AT.G........T.ATGTC.....................

Co-6 ........CA...A.GAC...AACA.CG.TG---------.------...........----------------..........................

Co-7 ATCTG...CTG..T.TAC...AGTCTCA.TT.G..CAA.AT..GC.T...........-.AT.G......A.T.ATGTC.....................

Co-8 ATCTG...CTG..C.TAC...AGTCTCA.TT.A..CAA.AT..GC.T...........-.AT.G........T.GTGTC.....................

HE681722 CATTG.CTCAC..AGT.G.T.AACTGCA.AG.TTGCAA.AAA.TA.GTTGCCTCCTAT.CA.AGGA.TTCAT.TGAGCAGCAACAGCAGCAGCAGCAGCA

610 620 630 640 650 660 670 680 690 700

ATCC-Cp -----CAACCA-CA-GCTACAAACTA-------CATTACCTCA-------GATAAAT------------AAA----------GACTCATATG-------A

Cp-1 ....................................................................................................

ATCC-Cm GCAAT.........TATC......C.TTACCAC....G....CTCAAGCT...C.GC.............G.ATACTACATT.C...C...ACAGCAGC.

Cm-1 ....................................................................................................

Cm-2 GCAAT.........TATC......C.TTACCAC....G....CTCAAGCT...C.GC.............G.ATACTACATT.C...C...ACAGCAGC.

ATCC-Co ....................................................................................................

Co-1 ....A...T..A..TATC......C.TTACCCC....G.....CCAAGTT...C..CTGCAAAGTTTGC..CAAACTACGTT.C...C...ACAGAGGA.

Co-2 ....A...T..A..TATC......C.TTACCCC....G.....CCAAGTT...C..CTGCAAAGTTTGC..CAAACTACGTT.C...C...ACAGAGGA.

Co-3 ....A...T..A..TATC.T....C.TTACCCC....G.....CCAAGTT...C..CTGCAAAGTTTGC..CAAACTACGTT.C...C...ACAGAGGA.

Co-4 .....------.--.-----------.......----------.......-------............---..........----------.......-

Co-5 ....A...T.....TATC.-....C.TTACCCC....G.....CCAAGTT.------............---..........----------.......-

Co-6 .....------.--.-----------.......----------.......-------............---..........----------.......-

Co-7 ....A...T..A..TATC......C.TTACCCC....G.....CCAAGTT...C..CTGCAAAGTTTGC..CAAACTACGTT.C...C...ACAGAGGA.

Co-8 ....A...T..A..TATC.T....C.TTACCCC....G.....CCAAGTT...C..CTGCAAAGTTTGC..CAAACTACGTT.C...C...ACAGAGGA.

HE681722 CTCCC.TC.TCAG.GTAATAC....GTCTCCTCTG..GAA.TGAAACTACCTAC.CATACATTCAAACC...AAAGAGACCAC.GC...TATCACTACAT

710 720 730 740 750 760 770 780 790 800

ATCC-CpACAAGAGCAACAACAGCAGCAATCACAGTGTACTCCTACC---GCCGGTAACGCCAATTCTTCATCCGATGAATTAAAAATACCGACTCATACATTTAAA

Cp-1 ....................................................................................................

ATCC-Cm G...C.A........A..A...CA...AGACT.G.G..TGCAAA.A.C..CTA.A.C......C..T..A..G..G...T.G..T.GA..C.........

Cm-1 ....................................................................................................

Cm-2 G...C.A........A..A...CA...AGACT.G.G..TGCAAA.A.C..CTA.A.C......C..T..A..G..G...T.G..T.GA..C.........

ATCC-Co ....................................................................................................

Co-1 TTC.T.TG.G..G..A.....GCAG...CAGCACT.CC.TCCTCAGA....TA.A.C.GTC..C..T.T.....G-------------------------

Co-2 TTC.T.TG.G..G..-.....GCAG...CAGCACT.CC.TCCTCA-------------------------------------------------------

Co-3 TTC.T.TG.G..G..A.....GCAG...C-----------...---------------------------------------------------------

Co-4 ----------------------------------------...---------------------------------------------------------

Co-5 ----------------------------------------...---------------------------------------------------------

Co-6 ----------------------------------------...---------------------------------------------------------

Co-7 TTC.T.TG.G..G..A.....GCAG...CAGCACT.CC.TCCTCAGA....TA.A.C.GTC..C..T.T......G...C....T..A........C...

Co-8 TTC.T.TG.G..G..A.....GCAGT.------CT..C.TCCT.AGA.C..TA.G.C.A.C..C..T.C......G...C....T..A........C...

HE681722 CATTC.A..TATGA.AGT.ACGAAGAT...G.TCT.ATGAATGATGAAATCAAA.755 ........................................

810 820 830 840 850 860 870 880

ATCC-CpCCGAAAAAGAGACCACAGCCATTATCATTACACCACTCAACTTATGAAAGCGATGAAGATA------------------------- 700

Cp-1 ...................................................................................... 700

ATCC-Cm ..A...........G..A.........C.T.GT..T.....C....GTG.AAG...T.G.GACGGTGAT................. 756

Cm-1 ...................................................................................... 700

Cm-2 ..A...........G..A.........C.T.GT..T.....C....GTG.AAG...T.G.GACGGTGAT................. 756

ATCC-Co ...................................................................................... 700

Co-1 -------------------------------------------------------------......................... 644

Co-2 -------------------------------------------------------------......................... 628

Co-3 -------------------------------------------------------------......................... 424

Co-4 -------------------------------------------------------------......................... 326

Co-5 -------------------------------------------------------------......................... 560

Co-6 -------------------------------------------------------------......................... 389

Co-7 ..A........................C....T..T.....A........T..C......GTGGATCTCAGAAGAGAAATCAAACG 752

Co-8 ..A..............A.........C....T..T-....A........T.........GTGGATCTCATG.............. 770

HE681722 ......................................................................................

**Fig. S1.** Multiple alignment of a fragment corresponding to the *BCR1* exon sequences of each genetic variant detected in this study and HE681722 (*C. orthopsilosis* strain Co 90-125)
